# Supplementary material for: Dissemination of imipenem-resistant Acinetobacter baumannii with new plasmid-borne blaOXA-72 in Taiwan
Source: PubMed Central journal article supplement (PMC3728158; doi:10.1186/1471-2334-13-319), 2013-07-13
Supplement: 1471-2334-13-319-S1.pdf [file 1471-2334-13-319-S1.pdf]

Supplementary Figure S1

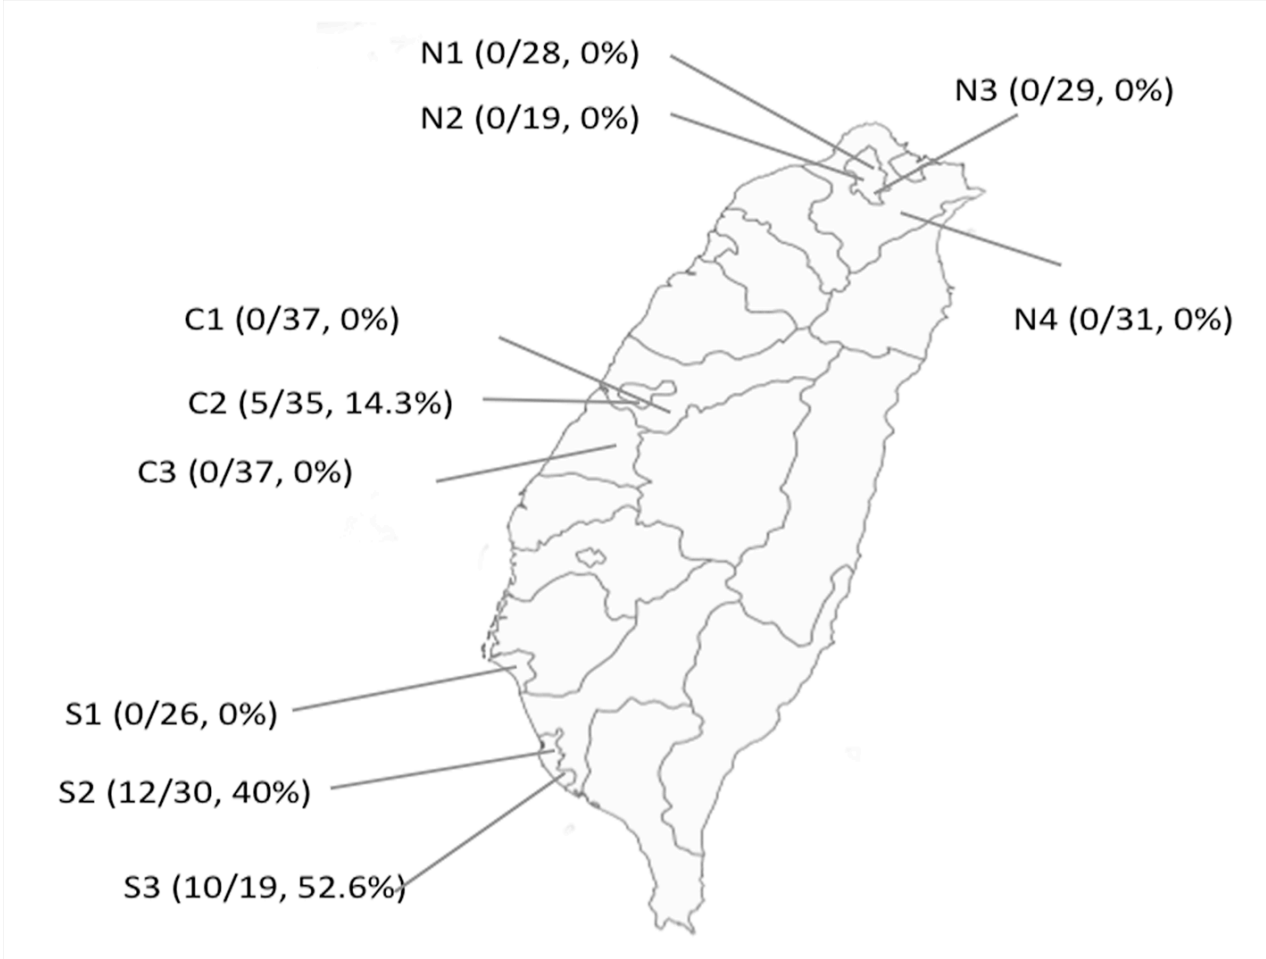

Supplementary figure legend

**Figure S1.** Distribution of *Acinetobacter baumannii* carrying *bla*<sub>OXA-72</sub> among 291 *A. baumannii* isolates collected from 10 teaching hospitals in Taiwan (N, northern; C, central; S southern).
